# Supplementary material for: S-doped Na2Ti6O13@TiO2 core–shell nanorods with enhanced visible light photocatalytic performance
Source: Royal Society of Chemistry journal article supplement (doi:10.1039/c5cp01552a), 2015-01-01
Supplement: c5cp01552a1.pdf [file c5cp01552a1.pdf]

## Supplementary Information

### **S-doped Na<sub>2</sub>Ti<sub>6</sub>O<sub>13</sub>@TiO<sub>2</sub> core-shell nanorods with an enhanced visible light photocatalytic performance**

Chao Liu<sup>a</sup>, Ji-yuan Liang<sup>a</sup>, Rui-rui Han<sup>a</sup>, Yong-zheng Wang<sup>a</sup>, Jin Zhao<sup>a</sup>, Qian-jin Huang<sup>b</sup>, Jing Chen<sup>\*b</sup>,  
Wen-hua Hou<sup>\*a</sup>

<sup>a</sup> *Key Laboratory of Mesoscopic Chemistry of MOE, School of Chemistry and Chemical Engineering, Nanjing University, Nanjing 210093, P. R. China.*

<sup>b</sup> *Department of Applied Chemistry, College of Science, Nanjing Tech University, Nanjing 211816, P. R. China.*

*\*Corresponding author. Tel: (+86)-25-83686001; E-mail: whou@nju.edu.cn; E-mail: cj1908@126.com*

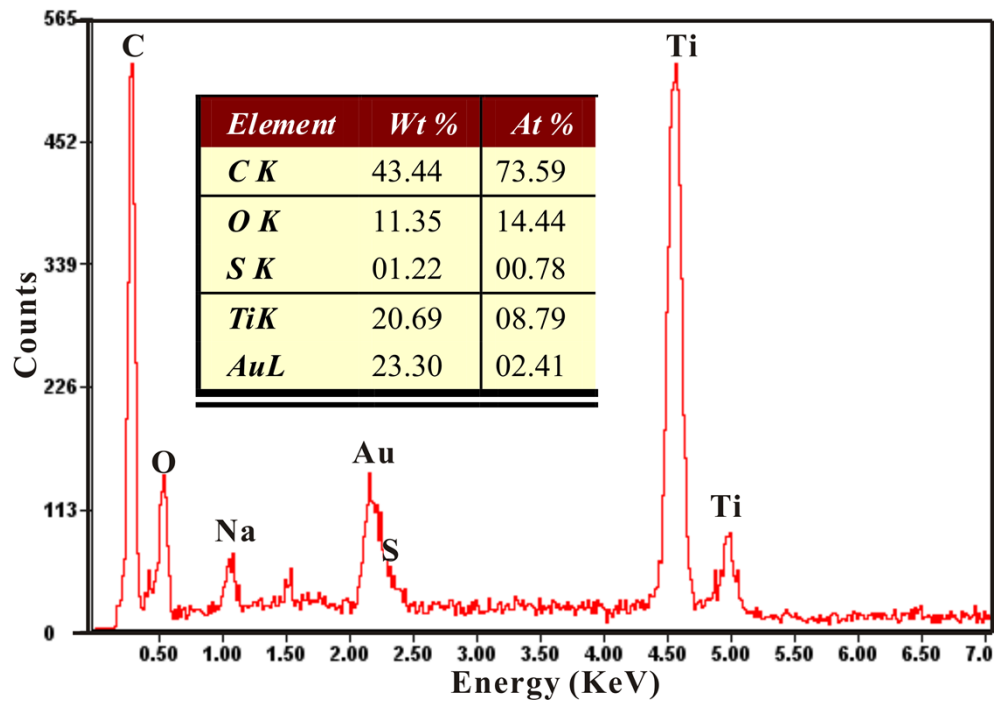

Fig. S1 The EDS result of S-TTO.

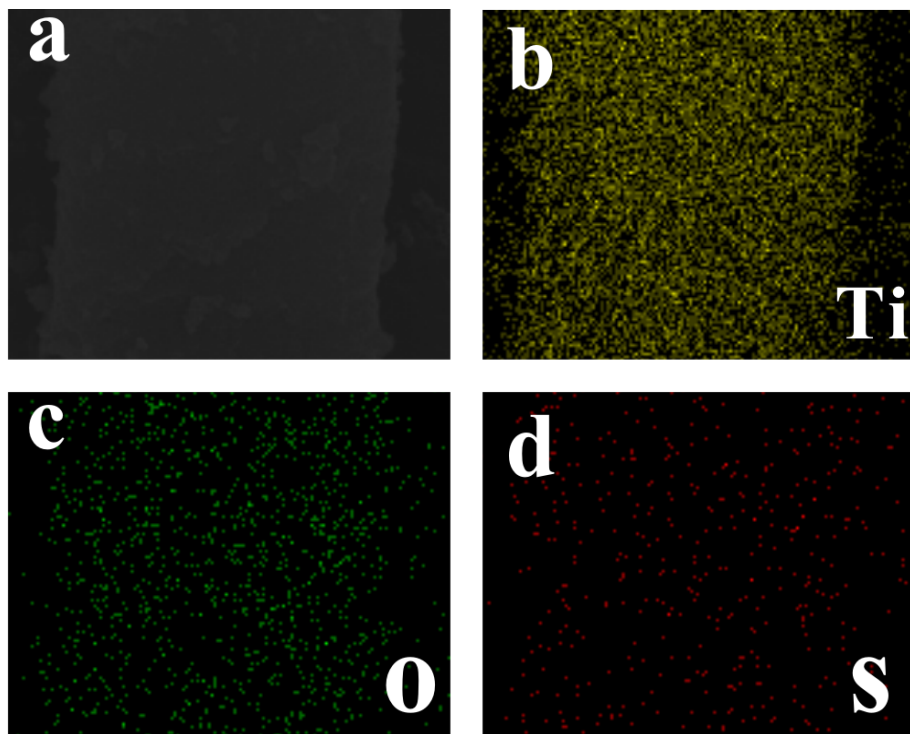

Fig. S2 EDS mapping of S-TTO.
